# Supplementary material
Source: HighWire-hosted journal article supplement (https://bmjopen.bmj.com/content/11/3/e040459)
Supplement: inline-supplementary-material-5 [file inline-supplementary-material-5.pdf]

**Supplementary appendix E. Subgroup analyses of studies reporting frailty measurement using the Fried phenotype compared to non-Fried phenotype. The squares indicate the mortality reported by each study. The diamonds indicate the pooled estimates for mortality.**

### Subgroup analysis of 30-day mortality

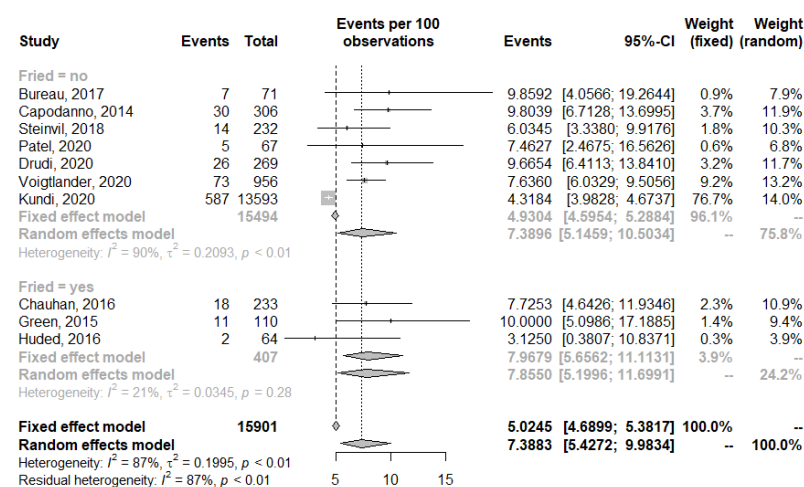

Test for subgroup differences:  $Q=0.05$  ( $p=0.8250$ )

### Subgroup analysis of 1-year mortality

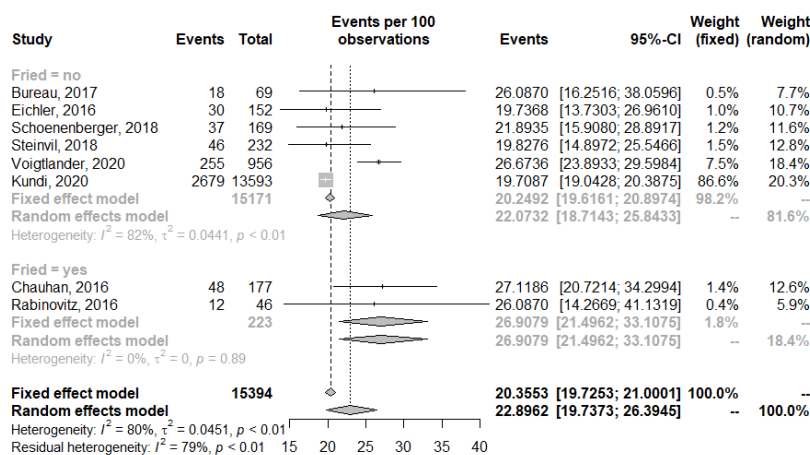

Test for subgroup differences:  $Q=2.02$  ( $p=0.1551$ )
